# Supplementary material for: Encapsulation of Luminescent Gold Nanoclusters into Synthetic Vesicles
Source: MDPI journal article supplement (doi:10.3390/nano12213875), 2022-11-02
Supplement: s1 [file s1]

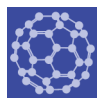

## Supplementary Materials

# Encapsulation of Luminescent Gold Nanoclusters into Synthetic Vesicles

Regina M. Chiechio <sup>1,2,3</sup>, Solène Ducarre <sup>3</sup>, Célia Marets <sup>1</sup>, Aurélien Dupont <sup>4</sup>, Pascale Even-Hernandez <sup>1</sup>, Xavier Pinson <sup>5</sup>, Stéphanie Dutertre <sup>5</sup>, Franck Artzner <sup>6</sup>, Paolo Musumeci <sup>2</sup>, Célia Ravel <sup>7,8</sup>, Maria Jose Lo Faro <sup>2,3</sup> and Valérie Marchi <sup>1,\*</sup>

<sup>1</sup> Institut des Sciences Chimiques de Rennes, CNRS UMR 6226, Université Rennes 1, F-35000 Rennes, France

<sup>2</sup> Dipartimento di Fisica e Astronomia “Ettore Majorana”, Università Di Catania, Via Santa Sofia 64, 95123 Catania, Italy

<sup>3</sup> IMM-CNR, Via S. Sofia 64, 95123 Catania, Italy

<sup>4</sup> BIOSIT, Inserm, CNRS UMS 3480, Université Rennes1, US\_S 018, F-35000 Rennes, France

<sup>5</sup> Microscopy Rennes Imaging Centre, SFR Biosit, CNRS UMS 3480—US INSERM 018, Université Rennes 1, F-35000 Rennes, France

<sup>6</sup> Institut de Physique, CNRS UMR 6251, Université Rennes 1, F-35000 Rennes, France

<sup>7</sup> Service de Biologie de la Reproduction-CECOS, CHU Rennes, 35000 Rennes, France

<sup>8</sup> Irset (Institut de Recherche en Santé, Environnement et Travail), Inserm, EHESP, Université Rennes 1, F-35000 Rennes, France

\* Correspondence: valerie.marchi@univ-rennes1.fr

**Citation:** Chiechio, R.M.; Ducarre, S.; Marets, C.; Dupont, A.;

Even-Hernandez, P.; Pinson, X.;

Dutertre, S.; Artzner, F.;

Musumeci, P.; Ravel, C.; et al.

Encapsulation of Luminescent Gold Nanoclusters into Synthetic Vesicles.

*Nanomaterials* **2022**, *12*, x.

<https://doi.org/10.3390/xxxxx>

Academic Editor: Rosario Pereiro

Received: 6 October 2022

Accepted: 26 October 2022

Published: 2 November 2022

**Publisher’s Note:** MDPI stays neutral with regard to jurisdictional claims in published maps and institutional affiliations.

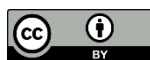

**Copyright:** © 2022 by the authors.

Submitted for possible open access publication under the terms and conditions of the Creative Commons Attribution (CC BY) license (<https://creativecommons.org/licenses/by/4.0/>).

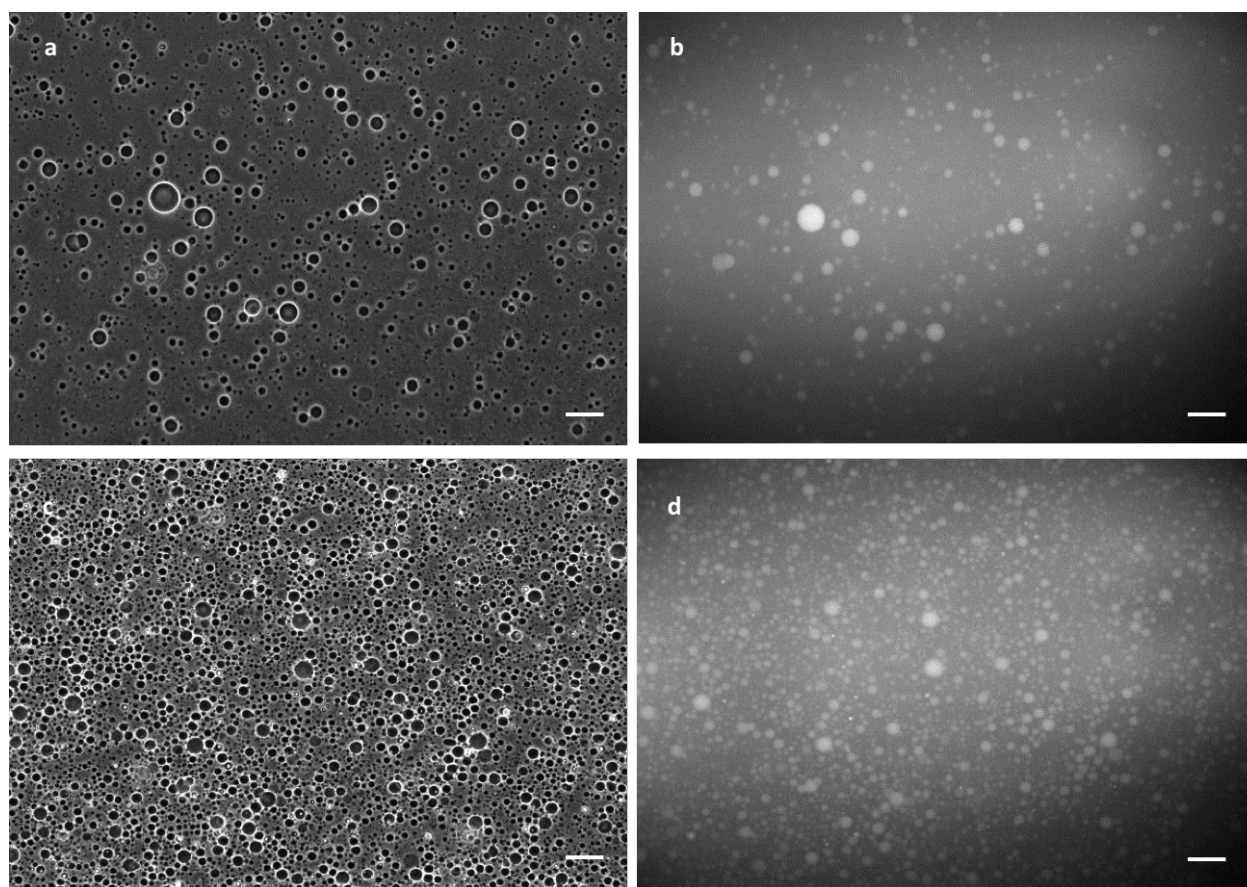

**Figure S1.** Phase contrast (left) or Fluorescence (right) Optical microscope images of C<sub>3</sub>E<sub>6</sub>D Red NCs encapsulated inside: (a,b) DOPC and (c,d) DOPC/DOTAP GUVs. Scale bar 20 μm.

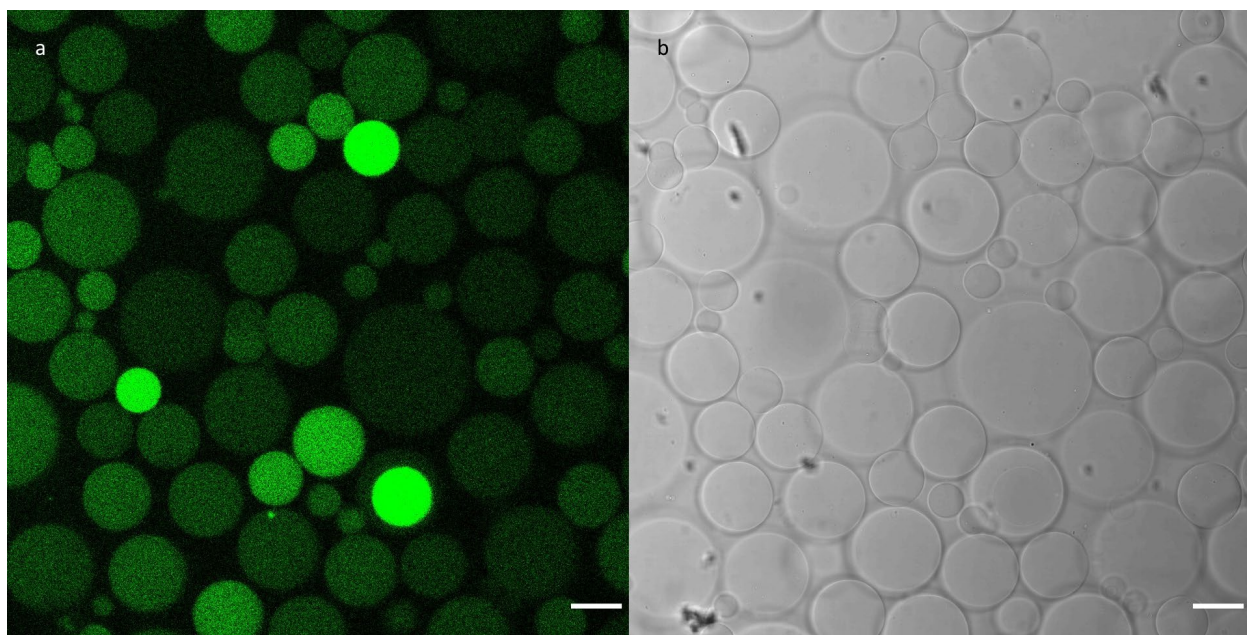

**Figure S2.** Confocal microscope (a) fluorescence and (b) bright field images of C<sub>3</sub>E<sub>6</sub>D Blue NCs encapsulated inside DOPC GUVs. Scale bar 20  $\mu$ m.

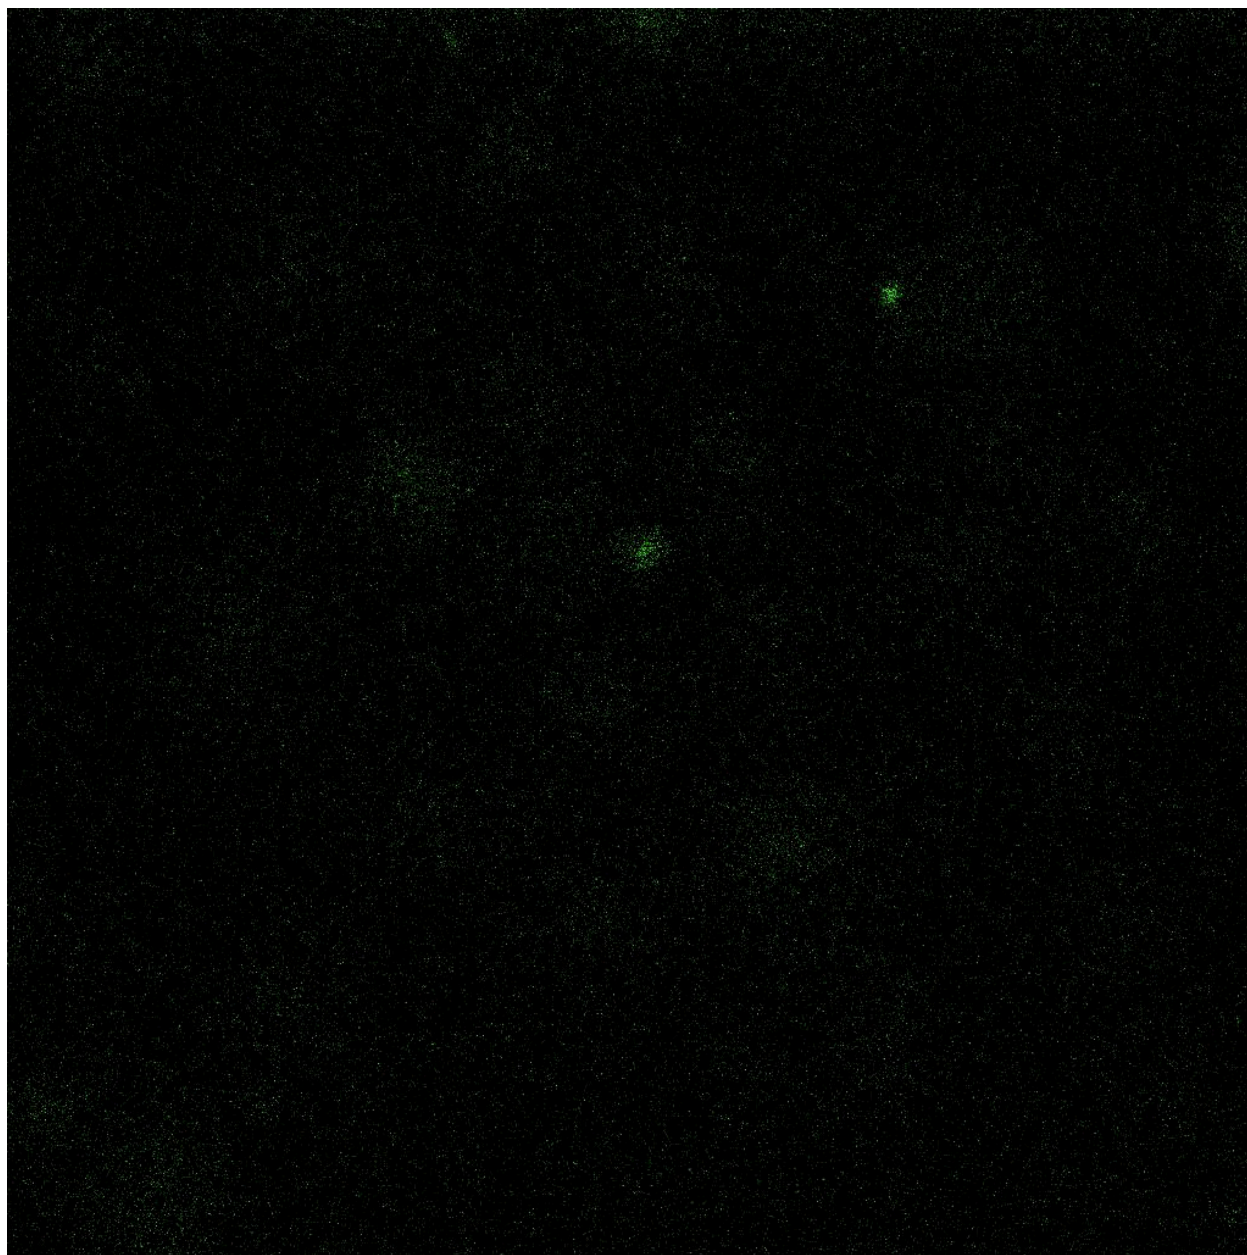

**Figure S3.** Confocal microscopy images (in z-stack) of C<sub>3</sub>E<sub>6</sub>D Blue NCs encapsulated inside DOPC GUVs corresponding to Figure S2a.



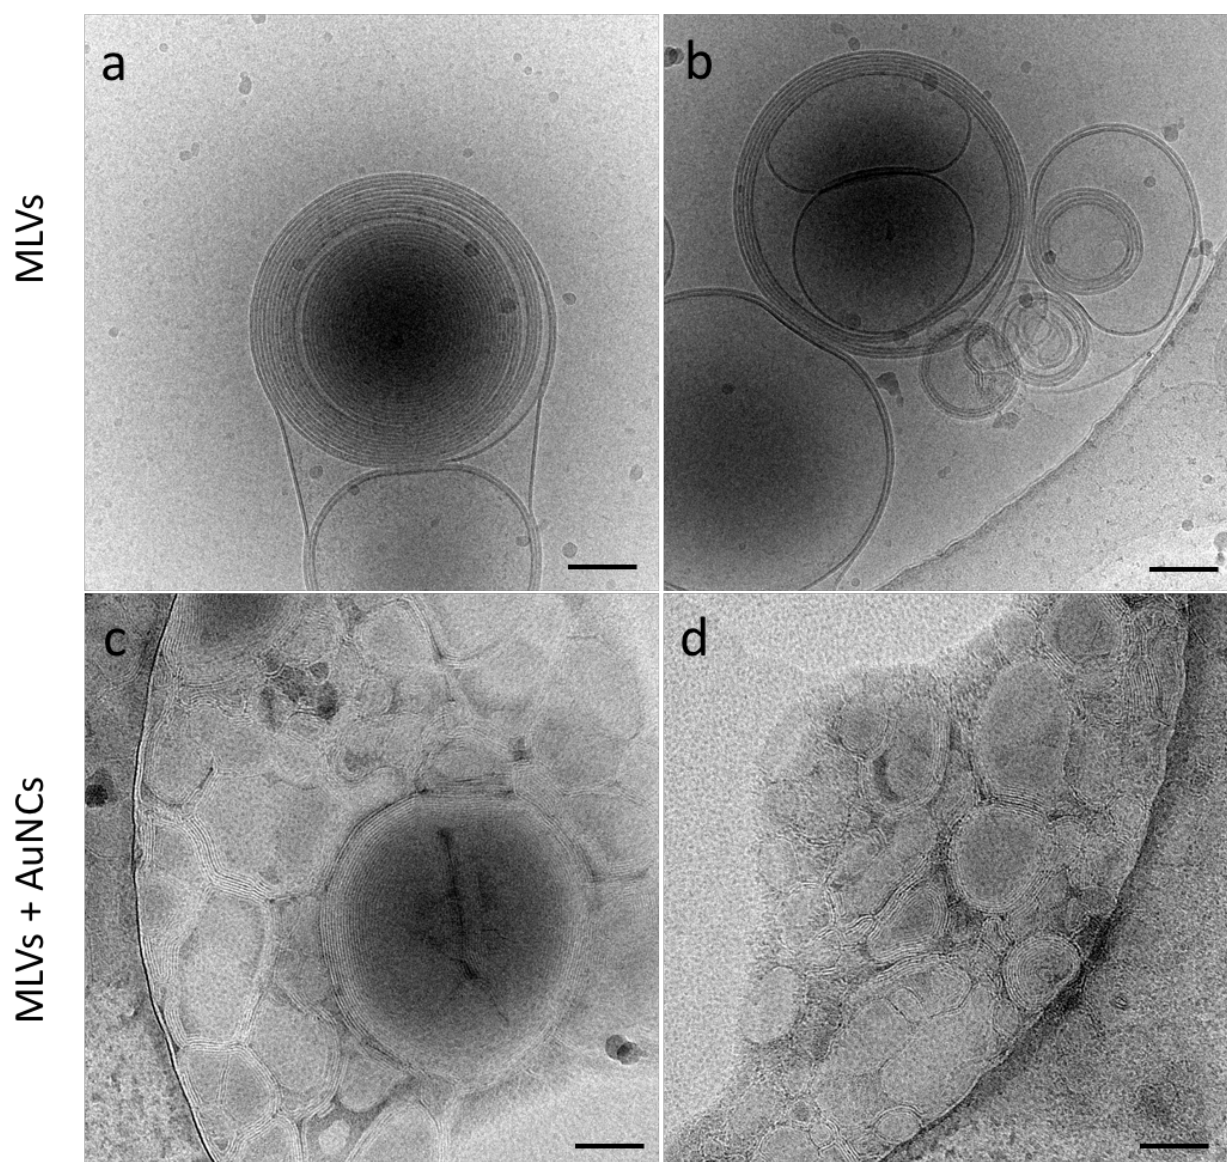

**Figure S4.** Cryo-TEM images of DOPC MLVs alone (a,b) and with Au NCs (c,d). Scale bar 200 nm.

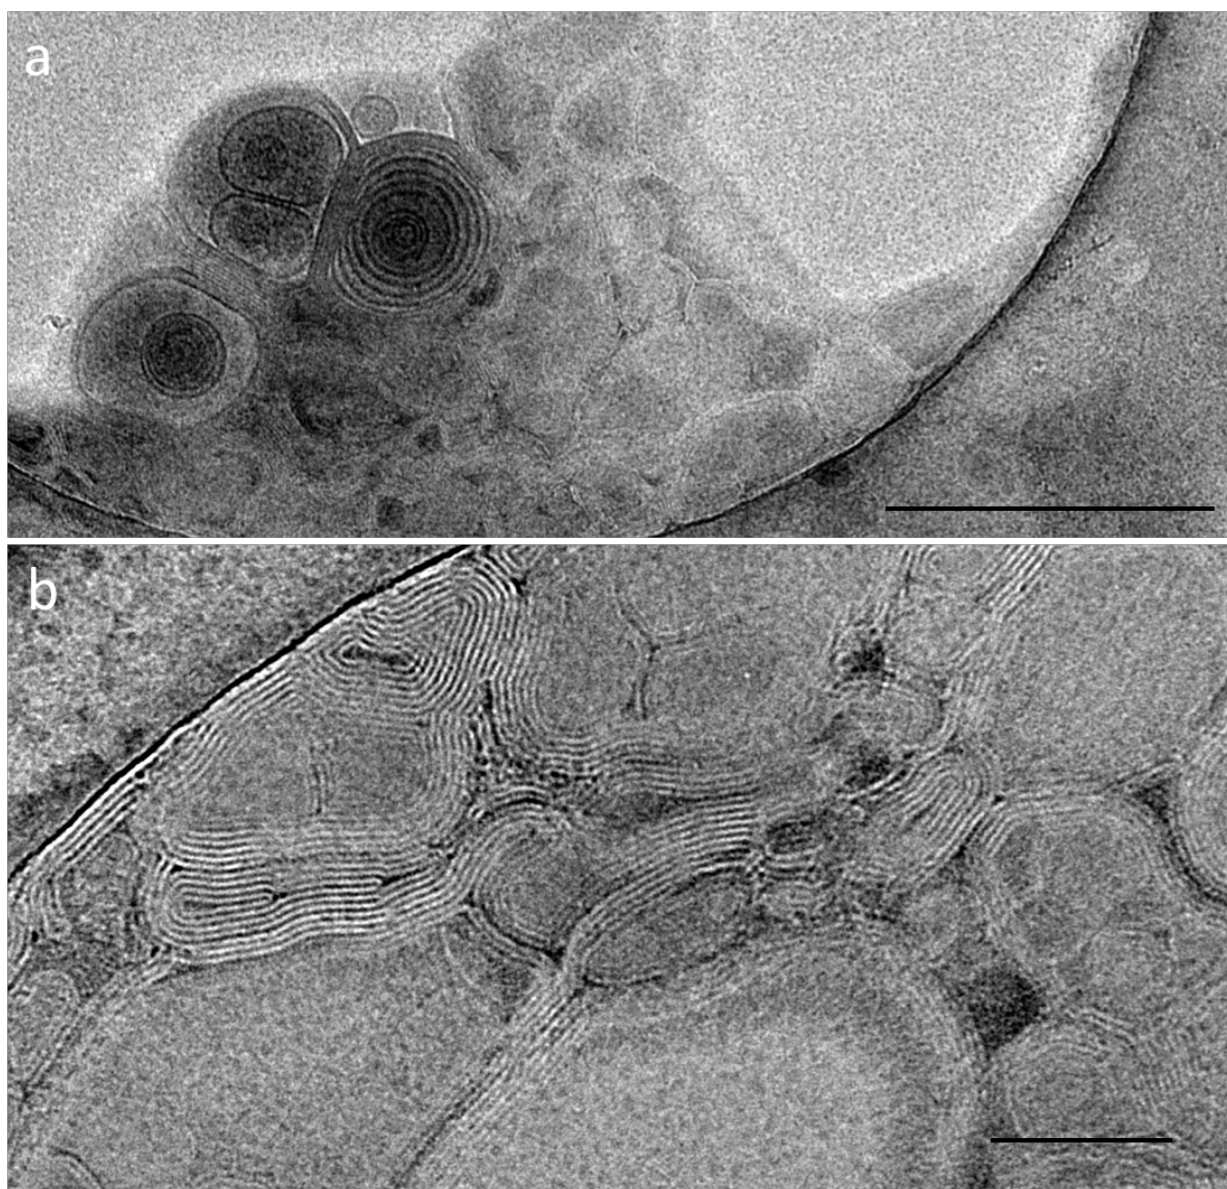

**Figure S5.** Cryo-TEM images of DOPC MLVs with Au NCs (**a,b**). Scale bar 400 nm.

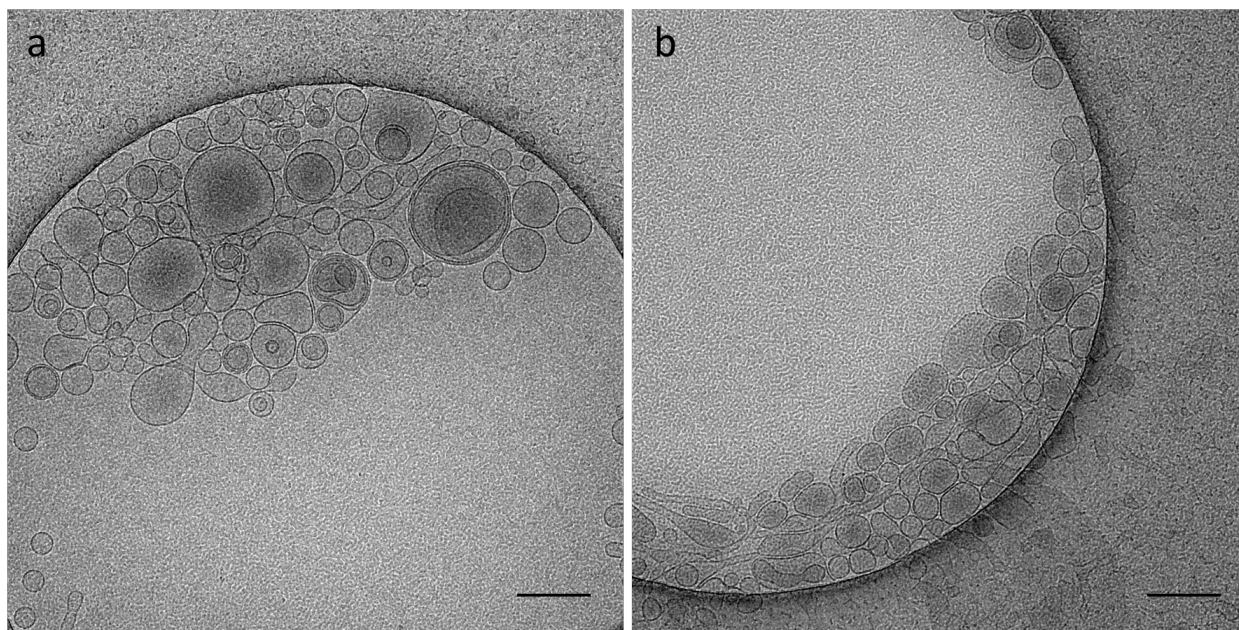

**Figure S6.** Cryo-TEM images of DOPC LUVs alone (**a,b**). Scale bar 200 nm.

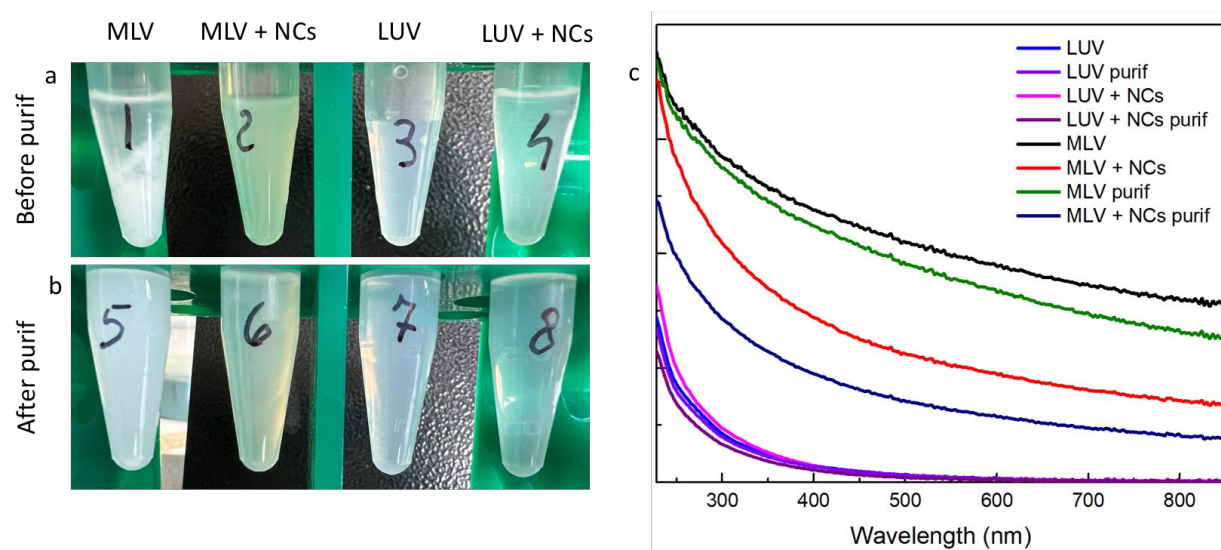

**Figure S7.** (a,b) Images of suspensions composed of the multilamellar vesicles (MLV) or unilamellar vesicles (LUV) alone and in presence of red AuNCs before and after purification; (c) corresponding UV-Vis spectra of the vesicles suspensions.
